# Supplementary material for: Genome-Scale Reconstruction and Analysis of the Pseudomonas putida KT2440 Metabolic Network Facilitates Applications in Biotechnology
Source: PLoS Comput Biol. 2008 Oct 31;4(10):e1000210. doi: 10.1371/journal.pcbi.1000210 (PMC2563689; doi:10.1371/journal.pcbi.1000210)
Supplement: Table S2 — BIOLOG assay details (0.02 MB XLS) [file pcbi.1000210.s008.xls]

## Sheet: BIOLOG
Substance	BIOLOG result	iJP829pre2			iJP829
		Present in model	In silico growth		Present in model	In silico growth
			External	Internal		External	Internal
α-cyclodextrin	-	-	-	-	-	-	-
Dextrin	-	-	-	-	-	-	-
Glycogen	-	+	-	+	+	-	+
Tween 40	+	-	-	-	-	-	-
Tween 80	+	-	-	-	-	-	-
N-Acetyl-D-Galactosamine	-	-	-	-	-	-	-
N-Acetyl-D-Glucosamine	-	+	-	-	+	-	-
Adonitol	-	-	-	-	-	-	-
L-Arabinose	-	-	-	-	-	-	-
D-Arabitol	-	-	-	-	-	-	-
D-Cellobiose	-	+	-	-	+	-	-
i-Erythritol	-	-	-	-	-	-	-
D-Fructose	+	+	+	+	+	+	+
L-Fucose	-	-	-	-	-	-	-
D-Galactose	-	-	-	-	-	-	-
Gentiobiose	-	-	-	-	-	-	-
-D-Glucose	+	+	+	+	+	+	+
m-Inositol	-	+	-	-	+	-	-
-D-Lactose	-	-	-	-	-	-	-
Lactulose	-	-	-	-	-	-	-
Maltose	-	-	-	-	-	-	-
D-Mannitol	-	-	-	-	-	-	-
D-Mannose	+	+	-	-	+	-	+
D-Melibiose	-	-	-	-	-	-	-
β-Methyl-D-Glucoside	-	-	-	-	-	-	-
D-Psicose	-	-	-	-	-	-	-
D-Raffinose	-	-	-	-	-	-	-
L-Rhamnose	-	-	-	-	-	-	-
D-Sorbitol	-	+	-	-	+	-	-
Sucrose	-	-	-	-	-	-	-
D-Trehalose	-	-	-	-	-	-	-
Turanose	-	-	-	-	-	-	-
Xylitol	-	-	-	-	-	-	-
Pyruvic Acid Methyl Ester	+	-	-	-	-	-	-
Succinic Acid Mono-Methyl-Ester	-	-	-	-	-	-	-
Acetic Acid	+	+	+	+	+	+	+
Cis-Aconitic Acid	+	+	-	+	+	-	+
Citric Acid	+	+	-	+	+	-	+
Formic Acid	+	+	-	+	+	-	-
D-Galactonic Acid Lactone	-	-	-	-	-	-	-
D-Galacturonic Acid	+	-	-	-	+	-	+
D-Gluconic Acid	+	+	+	+	+	+	+
D-Glucosaminic Acid	-	-	-	-	-	-	-
D-Glucuronic Acid	+	-	-	-	+	-	+
α-Hydroxybutyric Acid	-	-	-	-	-	-	-
β-Hydroxybutyric	+	+	-	+	+	-	+
γ-HydroxybutyricAcid	-	-	-	-	-	-	-
p-Hydroxy Phenylacetic Acid	-	+	-	-	+	-	-
Itaconic Acid	-	+	-	-	+	-	-
α-Keto Butyric Aci	-	+	-	+	+	-	+
α-Keto GlutaricAcid	+	+	-	+	+	+	+
α-Keto ValericAcid	+	-	-	-	-	-	-
D,L-Lactic Acid	+	+	-	+	+	+	+
Malonic Acid	-	-	-	-	-	-	-
Propionic Acid	+	+	-	+	+	-	+
Quinic Acid	+	-	-	-	+	-	+
D-Saccharic Acid	+	+	-	-	+	+	+
Sebacic Acid	-	-	-	-	-	-	-
Succinic Acid	+	+	-	+	+	+	+
Bromosuccinic Acid	+	-	-	-	-	-	-
Succinamic Acid	-	-	-	-	-	-	-
Glucuronamide	+	-	-	-	-	-	-
L-Alaninamide	+	-	-	-	-	-	-
D-Alanine	+	+	+	+	+	+	+
L-Alanine	+	+	+	+	+	+	+
L-Alanyl-glycine	+	-	-	-	-	-	-
L-Asparagine	+	+	-	+	+	+	+
L-Aspartic Acid	+	+	+	+	+	+	+
L-Glutamic Acid	+	+	+	+	+	+	+
Glycyl-L-AsparticAcid	-	-	-	-	-	-	-
Glycyl-L-GlutamicAcid	-	-	-	-	-	-	-
L-Histidine	+	+	-	+	+	+	+
Hydroxy-L-Proline	+	-	-	-	+	-	+
L-Leucine	+	+	-	+	+	+	+
L-Ornithine	+	+	-	+	+	+	+
L-Phenylalanine	+	+	+	+	+	+	+
L-Proline	+	+	+	+	+	+	+
L-Pyroglutamic Acid	+	-	-	-	-	-	-
D-Serine	-	+	-	-	+	-	-
L-Serine	+	+	+	+	+	+	+
L-Threonine	+	+	-	+	+	+	+
D,L-Carnitine	+	-	-	-	-	-	-
γ-Amino Butyric Acid	+	+	+	+	+	+	+
Urocanic Aci	-	+	-	+	+	-	+
Inosine	+	+	-	-	+	-	-
Uridine	+	+	-	-	+	-	-
Thymidine	-	+	-	-	+	-	-
Phenyethyl-amine	+	+	-	-	+	-	-
Putrescine	+	+	+	+	+	+	+
2-Aminoethanol	+	+	-	+	+	-	+
2,3-Butanediol	-	-	-	-	-	-	-
Glycerol	+	+	+	+	+	+	+
D,L-α-Glycerol Phosphate	-	+	-	+	+	-	+
α-D-Glucose-1-Phosphate	-	+	-	+	+	-	+
D-Glucose-6-Phosphate	-	+	-	+	+	-	+
